# Supplementary material
Source: PubMed Central journal article supplement (PMC5862773)
Supplement: NIHMS944794-supplement-Supplemental_File.pdf [file NIHMS944794-supplement-Supplemental_File.pdf]

## SUPPLEMENTAL MATERIAL

FAMILY CENTERED ADVANCE CARE PLANNING: SESSION 1  
THE LYON ADVANCED CARE PLANNING SURVEY  
RESULTS FOR ADOLESCENTS WITH HIV/AIDS, N=48  
PEDIATRIC PALLIATIVE CARE: QUALITY OF LIFE & SPIRITUAL STRUGGLE  
PI: MAUREEN E. LYON, PHD

### Advance Planning and Preparation

1. Have you ever written down any thoughts about your future health plans?

| %  | #  |                |
|----|----|----------------|
| 19 | 9  | Yes definitely |
| 0  | 0  | Very probably  |
| 2  | 1  | Probably       |
| 4  | 2  | Probably not   |
| 75 | 36 | Definitely not |
| 0  | 0  | Don't know     |

2. Advance directives allow people to make their health care choices known before becoming very ill or dying.

- a. Have you ever heard about and completed a Health Care Power of Attorney (HCPA), in which you name someone to make decisions about your health care in case you could not?

| %  | #  |                                |
|----|----|--------------------------------|
| 8  | 4  | Have heard about and completed |
| 19 | 9  | Have heard about               |
| 67 | 32 | Have not heard about           |
| 6  | 3  | Don't know                     |

- b. Have you ever heard about and completed an Advance Directive, such as Five Wishes?

| %  | #  |                                    |
|----|----|------------------------------------|
| 2  | 1  | Have heard about and completed     |
| 23 | 11 | Have heard about but not completed |
| 73 | 35 | Have not heard about               |
| 2  | 1  | Don't know                         |

3. a. Whether you have completed any advance directives/pre-plans or not, have you talked about your wishes for care at end of life with anyone? SELECT ALL THAT APPLY.

| %  | #  |                                                                         |
|----|----|-------------------------------------------------------------------------|
| 4  | 2  | Spouse/partner                                                          |
| 27 | 13 | Parents                                                                 |
| 10 | 5  | Siblings (brother/sister)                                               |
| 8  | 4  | Friends                                                                 |
| 10 | 5  | Boyfriend/girlfriend                                                    |
| 0  | 0  | Lawyer                                                                  |
| 6  | 3  | Primary Physician                                                       |
| 2  | 1  | Clergy (such a minister, rabbi, iman, etc.)                             |
| 8  | 4  | Other, (2 aunts, 1 grandmother, 1 order of my funeral, 1 social worker) |
| 63 | 30 | Have not talked with anyone                                             |

- 3.b. Do you have any children?

| %  | #  |                              |
|----|----|------------------------------|
| 8  | 4  | Yes (proceed to question 3c) |
| 92 | 44 | No (proceed to question 4)   |

- 3.c. If you have children, have you talked about plans for who will take care of your child/children, if you are not able to? SELECT ALL THAT APPLY.

| % | # |                                               |
|---|---|-----------------------------------------------|
| 2 | 1 | Spouse/partner                                |
| 4 | 2 | Parents                                       |
| 0 | 0 | Siblings                                      |
| 2 | 1 | Friends                                       |
| 4 | 2 | Boyfriend/Girlfriend                          |
| 0 | 0 | Lawyer                                        |
| 0 | 0 | Primary Physician                             |
| 0 | 0 | Clergy                                        |
| 1 | 1 | Other, please describe (no response recorded) |

4. If you were ill and knew that you would not get better, who would you want to be involved in decision about your end-of-life care? SELECT ALL THAT APPLY.

| %  | #  |                                                                                                                                                                                           |
|----|----|-------------------------------------------------------------------------------------------------------------------------------------------------------------------------------------------|
| 60 | 29 | Myself                                                                                                                                                                                    |
| 83 | 40 | My Family                                                                                                                                                                                 |
| 60 | 29 | My Doctor                                                                                                                                                                                 |
| 15 | 7  | Someone else, please specify (3-boyfriend, 1-Dad, 1-my bishop, 1-my grandma because my family does not know my diagnosis, 1-my mother only, 1-not sure, 1-spouse/girlfriend, 1-surrogate) |

5. When do you think it is the best time to bring up end-of-life decisions?

| %  | #  |                                                         |
|----|----|---------------------------------------------------------|
| 38 | 18 | While healthy                                           |
| 17 | 8  | When first diagnosed with a life-threatening illness    |
| 4  | 2  | When first sick from a life-threatening illness         |
| 8  | 4  | When first hospitalized with a life-threatening illness |
| 4  | 2  | If dying                                                |
| 19 | 9  | All of the above                                        |
| 10 | 5  | Don't know                                              |

6. Who are the best people/person on the treatment team to bring it up with you? SELECT ALL THAT APPLY.

| %  | #  |                           |
|----|----|---------------------------|
| 56 | 27 | Physician                 |
| 33 | 16 | Nurse Practitioner        |
| 27 | 13 | Nurse                     |
| 46 | 22 | Social Worker             |
| 17 | 8  | Psychologist              |
| 13 | 6  | Case Manager              |
| 4  | 1  | Chaplain                  |
| 10 | 5  | Patient Advocate          |
| 8  | 4  | Other (2-Mom, 2-not sure) |

7. Do you believe that once you make an important medical decision, for example, to be on a respirator, a machine that breathes for you, that you would be able to change your mind?

| %  | #  |                |
|----|----|----------------|
| 29 | 14 | Yes definitely |
| 17 | 8  | Very probable  |
| 25 | 12 | Probably       |
| 10 | 5  | Probably not   |
| 6  | 3  | Definitely no  |
| 13 | 6  | Don't know     |

8. Do you think your doctor or the hospital will respect your wishes, that is, do what you want about medical care?

| %  | #  |                |
|----|----|----------------|
| 69 | 33 | Yes definitely |
| 19 | 9  | Very probably  |
| 8  | 4  | Probably       |
| 4  | 2  | Probably not   |
| 0  | 0  | Definitely not |
| 0  | 0  | Don't know     |

9. Do you think your parent/ guardian/ surrogate understands your wishes?

| %  | #  |                |
|----|----|----------------|
| 58 | 28 | Yes definitely |
| 10 | 5  | Very probably  |
| 15 | 7  | Probably       |
| 13 | 6  | Probably not   |
| 2  | 1  | Definitely no  |
| 2  | 1  | Don't know     |

10. Do you think your parent/guardian / surrogate will respect your wishes, that is, do what you want about your medical care?

| %  | #  |                |
|----|----|----------------|
| 60 | 29 | Yes definitely |
| 8  | 4  | Very probably  |
| 21 | 10 | Probably       |
| 4  | 2  | Probably not   |
| 6  | 3  | Definitely no  |
| 0  | 0  | Don't know     |

#### Thoughts about Death and Dying

11. How often has death and dying been talked about in your family?

| %  | #  |              |
|----|----|--------------|
| 8  | 4  | Very often   |
| 17 | 8  | Often        |
| 15 | 7  | Occasionally |
| 42 | 20 | Rarely       |
| 17 | 8  | Never        |
| 2  | 1  | Don't know   |

12. How comfortable are you talking about death?

| %  | #  |                                      |
|----|----|--------------------------------------|
| 21 | 10 | Very comfortable                     |
| 21 | 10 | Somewhat Comfortable                 |
| 23 | 11 | Neither comfortable or uncomfortable |
| 21 | 10 | Not very comfortable                 |
| 8  | 4  | Not at all comfortable               |
| 6  | 3  | Don't know                           |

13. How likely are you to...

- a. Attend funerals or memorial services when a loved one, friend or a classmate dies

| %  | #  |                            |
|----|----|----------------------------|
| 42 | 20 | Very likely                |
| 38 | 18 | Somewhat likely            |
| 2  | 1  | Neither likely or unlikely |
| 10 | 5  | Not very likely            |
| 6  | 3  | Not at all likely          |
| 2  | 1  | Don't know                 |

- b. Avoid medical checkups because you are afraid the doctor will find "something serious"

| %  | #  |                            |
|----|----|----------------------------|
| 6  | 3  | Very likely                |
| 8  | 4  | Somewhat likely            |
| 8  | 4  | Neither likely or unlikely |
| 23 | 11 | Not very likely            |
| 50 | 24 | Not at all likely          |
| 4  | 2  | Don't know                 |

- c. Speak freely to loved ones about death and dying

| %  | #  |                            |
|----|----|----------------------------|
| 23 | 11 | Very likely                |
| 21 | 10 | Somewhat likely            |
| 15 | 7  | Neither likely or unlikely |
| 10 | 5  | Not very likely            |
| 27 | 13 | Not at all likely          |
| 4  | 2  | Don't know                 |

- d. Visit or telephone a friend or relative who has recently lost a loved one in order to see how they are doing

| %  | #  |                            |
|----|----|----------------------------|
| 52 | 25 | Very likely                |
| 33 | 16 | Somewhat likely            |
| 6  | 3  | Neither likely or unlikely |
| 4  | 2  | Not very likely            |
| 4  | 2  | Not at all likely          |
| 0  | 0  | Don't know                 |

- e. Preplan your own funeral, for example, choose someone to speak or choose the music you would want

| %  | #  |                            |
|----|----|----------------------------|
| 40 | 19 | Very likely                |
| 13 | 6  | Somewhat likely            |
| 4  | 2  | Neither likely or unlikely |
| 17 | 8  | Not very likely            |
| 17 | 8  | Not at all likely          |
| 10 | 5  | Don't know                 |

14. How afraid if at all, are you of...

- a. Dying from a long term illness

| %  | #  |                               |
|----|----|-------------------------------|
| 23 | 11 | Very afraid                   |
| 27 | 13 | Somewhat afraid               |
| 8  | 4  | Neither afraid nor not afraid |
| 17 | 8  | Not very afraid               |
| 21 | 10 | Not at all afraid             |
| 4  | 2  | Don't know                    |

- b. Dying suddenly, such as an accident, or being killed

| %  | #  |                               |
|----|----|-------------------------------|
| 38 | 18 | Very afraid                   |
| 29 | 14 | Somewhat afraid               |
| 0  | 0  | Neither afraid nor not afraid |
| 15 | 7  | Not very afraid               |
| 17 | 8  | Not at all afraid             |
| 2  | 1  | Don't know                    |

- c. Dying alone

| %  | #  |                               |
|----|----|-------------------------------|
| 23 | 11 | Very afraid                   |
| 15 | 7  | Somewhat afraid               |
| 10 | 5  | Neither afraid nor not afraid |
| 15 | 7  | Not very afraid               |
| 33 | 16 | Not at all afraid             |
| 4  | 2  | Don't know                    |

d. Dying in an institution such as a nursing home or hospital

| %  | #  |                               |
|----|----|-------------------------------|
| 15 | 7  | Very afraid                   |
| 13 | 6  | Somewhat afraid               |
| 15 | 7  | Neither afraid nor not afraid |
| 15 | 7  | Not very afraid               |
| 40 | 19 | Not at all afraid             |
| 4  | 2  | Don't know                    |

e. Dying painfully

| %  | #  |                               |
|----|----|-------------------------------|
| 44 | 21 | Very afraid                   |
| 27 | 13 | Somewhat afraid               |
| 2  | 1  | Neither afraid nor not afraid |
| 4  | 2  | Not very afraid               |
| 19 | 9  | Not at all afraid             |
| 4  | 2  | Don't know                    |

15. How strongly do you agree or disagree that...

a. Dying is an important part of life

| %  | #  |                           |
|----|----|---------------------------|
| 50 | 24 | Strongly agree            |
| 33 | 16 | Agree                     |
| 6  | 3  | Neither agree or disagree |
| 2  | 1  | Disagree                  |
| 2  | 1  | Strongly disagree         |
| 6  | 3  | Don't know                |

b. If someone could tell me when I would die, I would want to know

| %  | #  |                           |
|----|----|---------------------------|
| 27 | 13 | Strongly agree            |
| 19 | 9  | Agree                     |
| 13 | 6  | Neither agree or disagree |
| 15 | 7  | Disagree                  |
| 19 | 9  | Strongly disagree         |
| 8  | 4  | Don't know                |

16. What you think about death and dying, how concerned are you that...

a. The family's money wont last

| %  | #  |                                   |
|----|----|-----------------------------------|
| 15 | 7  | Very concerned                    |
| 33 | 16 | Concerned                         |
| 15 | 7  | Neither concerned nor unconcerned |
| 8  | 4  | Not concerned                     |
| 25 | 12 | Not at all concerned              |
| 4  | 2  | Don't know                        |

b. I will be a burden, or overload, to my family or friends

| %  | #  |                                   |
|----|----|-----------------------------------|
| 10 | 5  | Very concerned                    |
| 35 | 17 | Concerned                         |
| 6  | 3  | Neither concerned nor unconcerned |
| 19 | 9  | Not concerned                     |
| 17 | 8  | Not at all concerned              |
| 13 | 6  | Don't know                        |

17. Which of the following health problems, if any, do you think are worse than death?

SELECT ALL THAT APPLY.

| %  | #  |                                                                                                     |
|----|----|-----------------------------------------------------------------------------------------------------|
| 44 | 21 | Living with great pain                                                                              |
| 27 | 13 | Total physical dependency on others, for example, being in a wheelchair                             |
| 54 | 26 | Not being able to communicate my wishes and/or care to family members, for example, being in a coma |
| 33 | 16 | None are worse than death                                                                           |

### Dealing with Dying

18. How important would each of the following be to you if you were dealing with your own dying?

a. Family and friends visiting you

| %  | #  |                                   |
|----|----|-----------------------------------|
| 73 | 35 | Very important                    |
| 19 | 9  | Somewhat important                |
| 4  | 2  | Neither important nor unimportant |
| 0  | 0  | Not very important                |
| 2  | 1  | Not at all important              |
| 2  | 1  | Don't know                        |



b. Being able to stay in your own home

| %  | #  |                                   |
|----|----|-----------------------------------|
| 52 | 25 | Very important                    |
| 33 | 16 | Somewhat important                |
| 0  | 0  | Neither important nor unimportant |
| 8  | 4  | Not very important                |
| 4  | 2  | Not at all important              |
| 2  | 1  | Don't know                        |

c. Honest answers from your doctor

| %  | #  |                                   |
|----|----|-----------------------------------|
| 90 | 43 | Very important                    |
| 6  | 3  | Somewhat important                |
| 4  | 2  | Neither important nor unimportant |
| 0  | 0  | Not very important                |
| 0  | 0  | Not at all important              |
| 0  | 0  | Don't know                        |

d. Comfort from church services or persons such as a minister, priest, imam, or rabbi

| %  | #  |                                   |
|----|----|-----------------------------------|
| 35 | 17 | Very important                    |
| 29 | 14 | Somewhat important                |
| 15 | 7  | Neither important nor unimportant |
| 6  | 3  | Not very important                |
| 13 | 6  | Not at all important              |
| 2  | 1  | Don't know                        |

e. Planning your own funeral

| %  | #  |                                   |
|----|----|-----------------------------------|
| 38 | 18 | Very important                    |
| 30 | 14 | Somewhat important                |
| 2  | 1  | Neither important nor unimportant |
| 6  | 3  | Not very important                |
| 9  | 4  | Not at all important              |
| 15 | 7  | Don't know                        |

f. Being able to complete an advance directive that would let your loved ones know your wishes, if you were unable to speak for yourself

| %  | #  |                                   |
|----|----|-----------------------------------|
| 77 | 37 | Very important                    |
| 15 | 7  | Somewhat important                |
| 2  | 1  | Neither important nor unimportant |
| 0  | 0  | Not very important                |
| 6  | 3  | Not at all important              |
| 0  | 0  | Don't know                        |

g. Fulfilling personal goals/ pleasures

| %  | #  |                                   |
|----|----|-----------------------------------|
| 77 | 37 | Very important                    |
| 19 | 9  | Somewhat important                |
| 0  | 0  | Neither important nor unimportant |
| 0  | 0  | Not very important                |
| 0  | 0  | Not at all important              |
| 4  | 2  | Don't know                        |

h. Reviewing your life history with your family

| %  | #  |                      |
|----|----|----------------------|
| 46 | 22 | Very important       |
| 35 | 17 | Somewhat important   |
| 6  | 3  | Neither important    |
| 6  | 3  | Not very important   |
| 4  | 2  | Not at all important |
| 2  | 1  | Don't know           |

i. Having health care professionals visit you at your home

| %  | #  |                                   |
|----|----|-----------------------------------|
| 35 | 17 | Very important                    |
| 50 | 24 | Somewhat important                |
| 6  | 3  | Neither important nor unimportant |
| 2  | 1  | Not very important                |
| 4  | 2  | Not at all important              |
| 2  | 1  | Don't know                        |

j. Understanding your treatment choices

| %  | #  |                                   |
|----|----|-----------------------------------|
| 92 | 44 | Very important                    |
| 4  | 2  | Somewhat important                |
| 2  | 1  | Neither important nor unimportant |
| 0  | 0  | Not very important                |
| 0  | 0  | Not at all important              |
| 2  | 1  | Don't know                        |

19. How important are each of the following to you when you think about dying?

a. Being physically comfortable

| %  | #  |                                   |
|----|----|-----------------------------------|
| 75 | 36 | Very important                    |
| 15 | 7  | Somewhat important                |
| 4  | 2  | Neither important nor unimportant |
| 0  | 0  | Not very important                |
| 4  | 2  | Not at all important              |
| 2  | 1  | Don't know                        |

b. Being free from pain

| %  | #  |                                   |
|----|----|-----------------------------------|
| 88 | 42 | Very important                    |
| 8  | 4  | Somewhat important                |
| 2  | 1  | Neither important nor unimportant |
| 0  | 0  | Not very important                |
| 0  | 0  | Not at all important              |
| 2  | 1  | Don't know                        |

c. Having said everything I want to say to people in my family

| %  | #  |                                   |
|----|----|-----------------------------------|
| 79 | 38 | Very important                    |
| 15 | 7  | Somewhat important                |
| 4  | 2  | Neither important nor unimportant |
| 2  | 1  | Not very important                |
| 0  | 0  | Not at all important              |
| 0  | 0  | Don't know                        |

d. Being at peace spiritually

| %  | #  |                                   |
|----|----|-----------------------------------|
| 77 | 37 | Very important                    |
| 17 | 8  | Somewhat important                |
| 2  | 1  | Neither important nor unimportant |
| 0  | 0  | Not very important                |
| 4  | 2  | Not at all important              |
| 0  | 0  | Don't know                        |

e. Not being a burden to loved ones

| %  | #  |                                   |
|----|----|-----------------------------------|
| 56 | 27 | Very important                    |
| 31 | 15 | Somewhat important                |
| 4  | 2  | Neither important nor unimportant |
| 2  | 1  | Not very important                |
| 4  | 2  | Not at all important              |
| 2  | 1  | Don't know                        |

f. Knowing how to say goodbye

| %  | #  |                                   |
|----|----|-----------------------------------|
| 71 | 34 | Very important                    |
| 17 | 8  | Somewhat important                |
| 4  | 2  | Neither important nor unimportant |
| 4  | 2  | Not very important                |
| 0  | 0  | Not at all important              |
| 4  | 2  | Don't know                        |

g. Having a sense of your own worth or value

| %  | #  |                                   |
|----|----|-----------------------------------|
| 77 | 37 | Very important                    |
| 10 | 5  | Somewhat important                |
| 4  | 2  | Neither important nor unimportant |
| 4  | 2  | Not very important                |
| 2  | 1  | Not at all important              |
| 2  | 1  | Don't know                        |

h. Being off machines that extend life such as life support

| %  | #  |                                   |
|----|----|-----------------------------------|
| 35 | 17 | Very important                    |
| 35 | 17 | Somewhat important                |
| 8  | 4  | Neither important nor unimportant |
| 4  | 2  | Not very important                |
| 6  | 3  | Not at all important              |
| 10 | 5  | Don't know                        |

i. Dying a natural death

| %  | #  |                                   |
|----|----|-----------------------------------|
| 65 | 31 | Very important                    |
| 13 | 6  | Somewhat important                |
| 6  | 3  | Neither important nor unimportant |
| 0  | 0  | Not very important                |
| 2  | 1  | Not at all important              |
| 15 | 7  | Don't know                        |

20. If death were likely to happen in the next few weeks, and you could choose where to die, where would you MOST want to die? CHECK ONE answer only.

| %  | #  |                                |
|----|----|--------------------------------|
| 52 | 25 | At home                        |
| 0  | 0  | In an assisted-living facility |
| 13 | 6  | In a hospital                  |
| 0  | 0  | In a nursing home              |
| 0  | 0  | In a residential hospice       |
| 35 | 17 | Don't know                     |

21. Below are some statements related to pain near the end-of-life that have been expressed by people. How strongly do you agree or disagree with each statement?

a. I am afraid my doctor may not believe I am in pain and treat my pain

| %  | #  |                            |
|----|----|----------------------------|
| 13 | 6  | Strongly agree             |
| 17 | 8  | Agree                      |
| 13 | 6  | Neither agree nor disagree |
| 23 | 11 | Disagree                   |
| 25 | 12 | Strongly disagree          |
| 10 | 5  | Don't know                 |

b. I would only take pain medicines when the pain is severe

| %  | #  |                           |
|----|----|---------------------------|
| 31 | 15 | Strongly agree            |
| 33 | 16 | Agree                     |
| 6  | 3  | Neither agree or disagree |
| 15 | 7  | Disagree                  |
| 8  | 4  | Strongly disagree         |
| 6  | 3  | Don't know                |

c. I will become addicted to pain medicines over time

| %  | #  |                           |
|----|----|---------------------------|
| 4  | 2  | Strongly agree            |
| 4  | 2  | Agree                     |
| 17 | 8  | Neither agree or disagree |
| 31 | 15 | Disagree                  |
| 35 | 17 | Strongly disagree         |
| 8  | 4  | Don't know                |

d. I will take low dose and save large dose for when pain is worse

| %  | #  |                            |
|----|----|----------------------------|
| 27 | 13 | Strongly agree             |
| 27 | 13 | Agree                      |
| 4  | 2  | Neither agree nor disagree |
| 17 | 8  | Disagree                   |
| 8  | 4  | Strongly disagree          |
| 17 | 8  | Don't know                 |

e. Youth will be given too much pain medicine

| %  | #  |                           |
|----|----|---------------------------|
| 4  | 2  | Strongly agree            |
| 31 | 15 | Agree                     |
| 15 | 7  | Neither agree or disagree |
| 23 | 11 | Disagree                  |
| 19 | 9  | Strongly disagree         |
| 8  | 4  | Don't know                |

22. Have you heard of hospice services?

| %  | #  |                             |
|----|----|-----------------------------|
| 73 | 35 | Yes                         |
| 27 | 13 | No (if no skip to Q23 & 24) |

23. How did you learn about hospice services?

| %  | # |                                            |       |
|----|---|--------------------------------------------|-------|
| 38 | 5 | I know someone who used hospice services   |       |
| 8  | 1 | I have used hospice services myself        |       |
| 31 | 4 | I am/was a hospice volunteer               |       |
| 23 | 3 | I heard from a health care professional    |       |
| 0  | 0 | I read literature/newspaper/TV/radio/other | media |
| 0  | 0 | I heard from others                        |       |
| 0  | 0 | No response                                |       |

24. If you were dying, would you want hospice support?

| %  | # |                       |
|----|---|-----------------------|
| 7  | 1 | Yes                   |
| 50 | 7 | No                    |
| 43 | 6 | Do not know/ not sure |
| 0  | 0 | No response           |

### Spiritual Well-Being

25. Do you consider yourself...?

| %  | #  |                               |
|----|----|-------------------------------|
| 17 | 8  | Very religious/ spiritual     |
| 58 | 28 | Somewhat religious/ spiritual |
| 8  | 4  | Not very religious/ spiritual |
| 13 | 6  | Not religious/ spiritual      |
| 4  | 2  | Do not know                   |
| 0  | 0  | No response                   |

26. How often do you attend religious or spiritual services?

| %  | #  |             |
|----|----|-------------|
| 14 | 6  | Always      |
| 24 | 10 | Very often  |
| 26 | 11 | Sometimes   |
| 33 | 14 | Rarely      |
| 0  | 0  | Never       |
| 2  | 1  | Do not know |

27. How often does your religion or spirituality help you face your fears or do what you were afraid to do?

| %  | #  |                     |
|----|----|---------------------|
| 31 | 13 | Everyday            |
| 19 | 8  | A few times a week  |
| 19 | 8  | A few times a month |
| 21 | 9  | Rarely              |
| 7  | 3  | Never               |
| 2  | 1  | Don't know          |

### About You

28. How many times in your life have you been seen at an emergency room?

29. How many times in your life have you ever been hospitalized?

29.a. How many nights has \_\_\_\_\_(youth) spent in a hospital in his/her life?

29.b. How many of those nights were psychiatric hospitalizations, for example, for behavior problems or depression?

29.c. How many nights have you spent psychiatrically hospitalized in the past year?

| Variable     | N  | Mean | Std Dev | Min | Max |
|--------------|----|------|---------|-----|-----|
| ER           | 48 | 16.3 | 35.0    | 0   | 200 |
| Hospitalized | 48 | 6.6  | 13.7    | 0   | 60  |
| Nights       | 48 | 2.4  | 5.8     | 0   | 27  |
| Nights_BP    | 48 | 0.1  | 0.4     | 0   | 2   |
| Nights_H_PSY | 48 | 0.6  | 3.3     | 0   | 23  |

### DURING THE PAST FOUR WEEKS:

30. How many nights has \_\_\_\_\_(youth) stayed in a hospital?

| %  | #  |                                  |
|----|----|----------------------------------|
| 94 | 45 | no night spent in the hospital   |
| 6  | 3  | 1-2 nights spent in the hospital |
| 0  | 0  | 3-5 nights                       |
| 0  | 0  | 6-10 nights                      |
| 0  | 0  | 11-20 nights                     |
| 0  | 0  | >20 nights                       |

31. How healthy do you think \_\_\_\_\_(youth) thinks he/she is feeling right now?

| %  | #  |                  |
|----|----|------------------|
| 31 | 15 | Excellent health |
| 40 | 19 | Very good health |
| 17 | 8  | Good health      |
| 13 | 6  | Fair health      |
| 0  | 0  | Poor health      |
| 0  | 0  | Don't know       |

32. Is your mother alive?

| %  | #  |             |
|----|----|-------------|
| 21 | 10 | No          |
| 79 | 38 | Yes         |
| 0  | 0  | Do not know |

33. Your father alive?

| %  | #  |             |
|----|----|-------------|
| 21 | 10 | No          |
| 66 | 31 | Yes         |
| 13 | 6  | Do not know |
